# Supplementary material for: High-density surface protuberances endow ternary PtFeSn nanowires with high catalytic performance for efficient alcohol electro-oxidation
Source: Royal Society of Chemistry journal article supplement (doi:10.1039/c9nr06343a), 2019-01-01
Supplement: c9nr06343a1.pdf [file c9nr06343a1.pdf]

## Supporting Information for

# High-density Surface Protuberances Endow Ternary PtFeSn Nanowires with High Catalytic Performance for Efficient Alcohol Electrooxidation

Cheng Wang,<sup>a</sup> Hui Xu,<sup>a</sup> Fei Gao,<sup>a</sup> Yangping Zhang,<sup>a</sup> Tongxin Song,<sup>a</sup> Caiqin Wang,<sup>b\*</sup>

Hongyuan Shang,<sup>a</sup> Xing Zhu,<sup>c</sup> Yukou Du<sup>a\*</sup>

<sup>a</sup> College of Chemistry, Chemical Engineering and Materials Science, Soochow University, Suzhou 215123, PR China

<sup>b</sup> College of Science & Institute of Materials Physics and Chemistry, Nanjing Forestry University, Nanjing 210037, P. R. China

<sup>c</sup> Testing and Analysis Center, Soochow University, Suzhou, 215123, P.R. China.

\* Corresponding author: Tel: 86-512-65880089, Fax: 86-512-65880089;

E-mail: duyk@suda.edu.cn (Y. Du), wangcaiqin@njfu.edu.cn (C. Wang).

## Supporting Figures and Tables

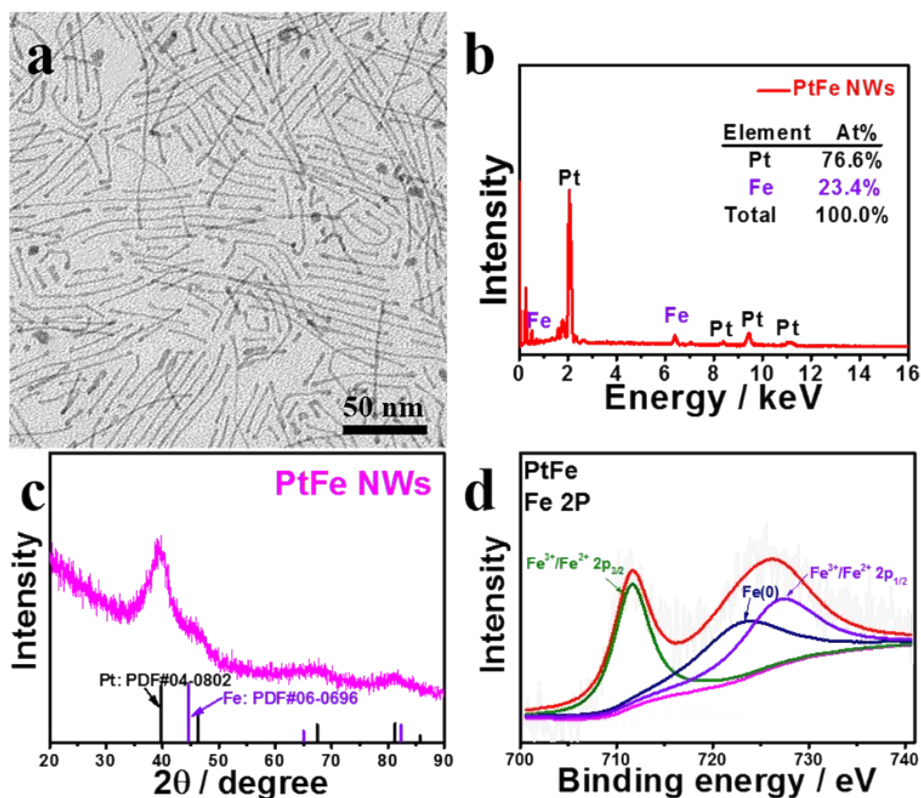

**Fig. S1** (a) The TEM image, (b) SEM-EDS spectrum, (c) XRD pattern and (d) XPS pattern of the PtFe NWs.

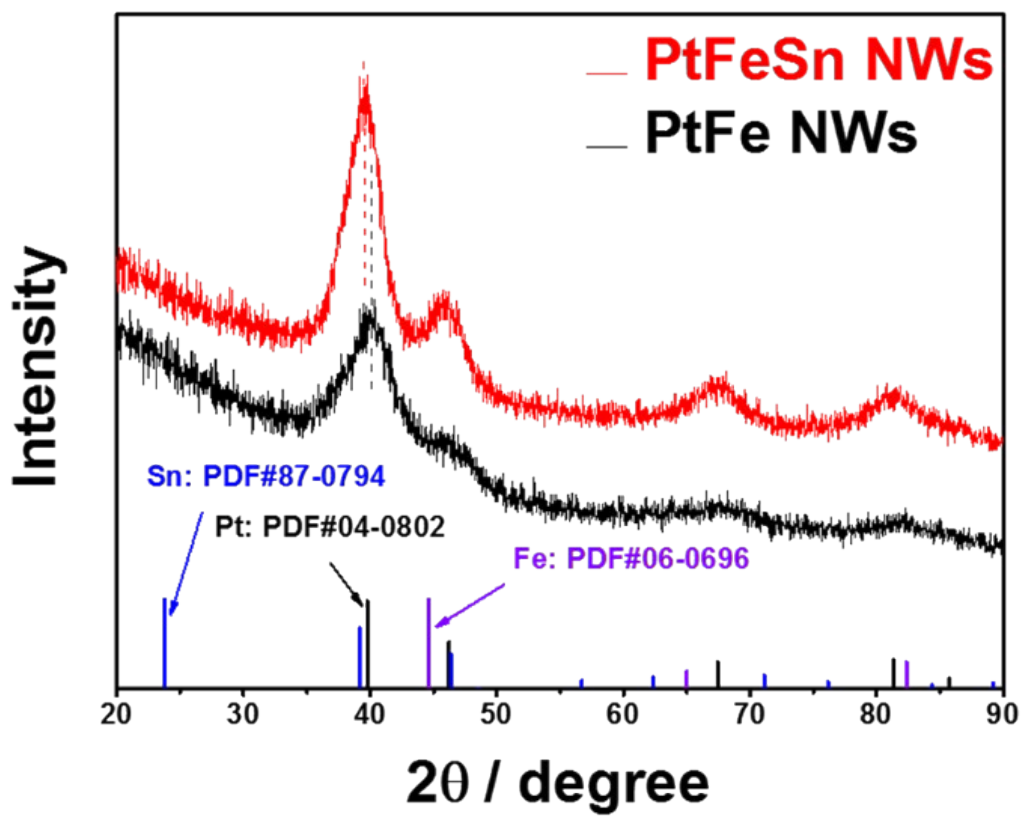

Fig. S2 XRD patterns of PtFeSn and PtFe NWs.

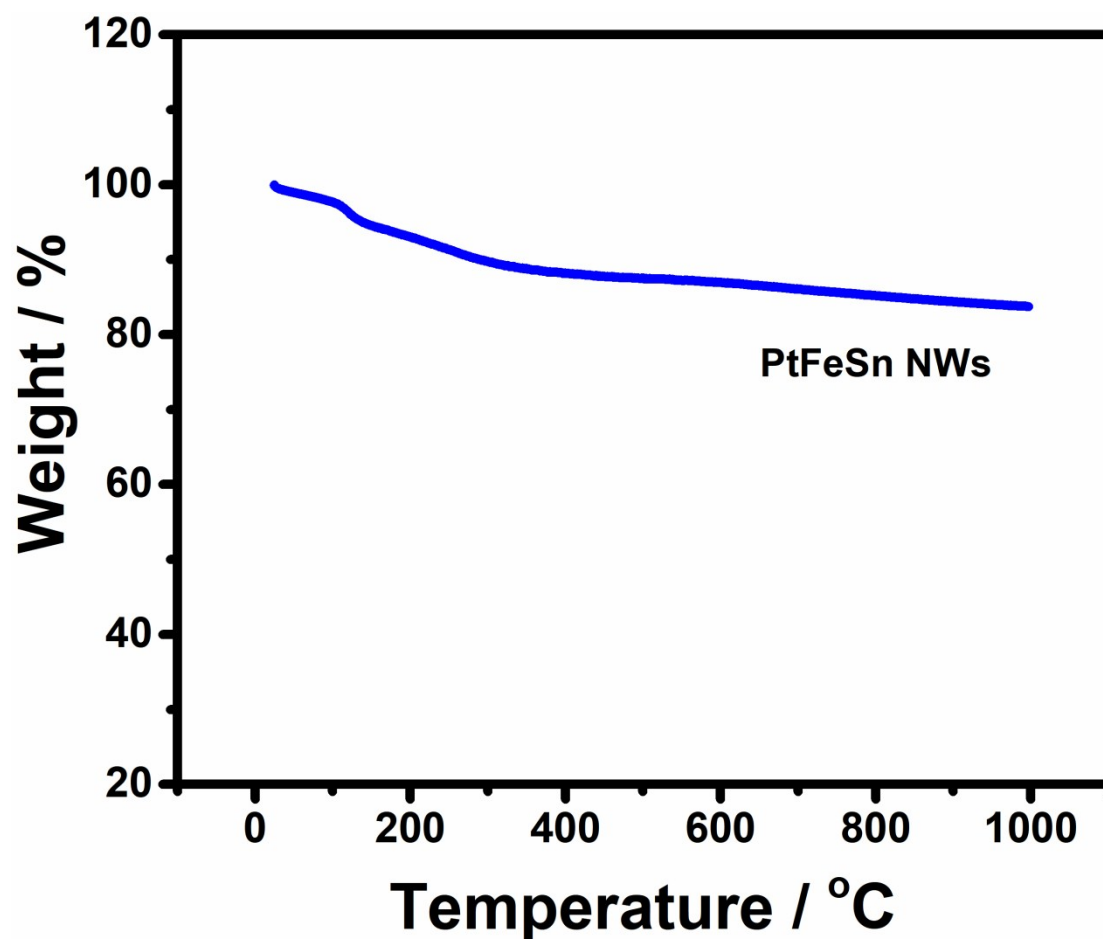

Fig.S3 TGA curve of PtFeSn NWs.

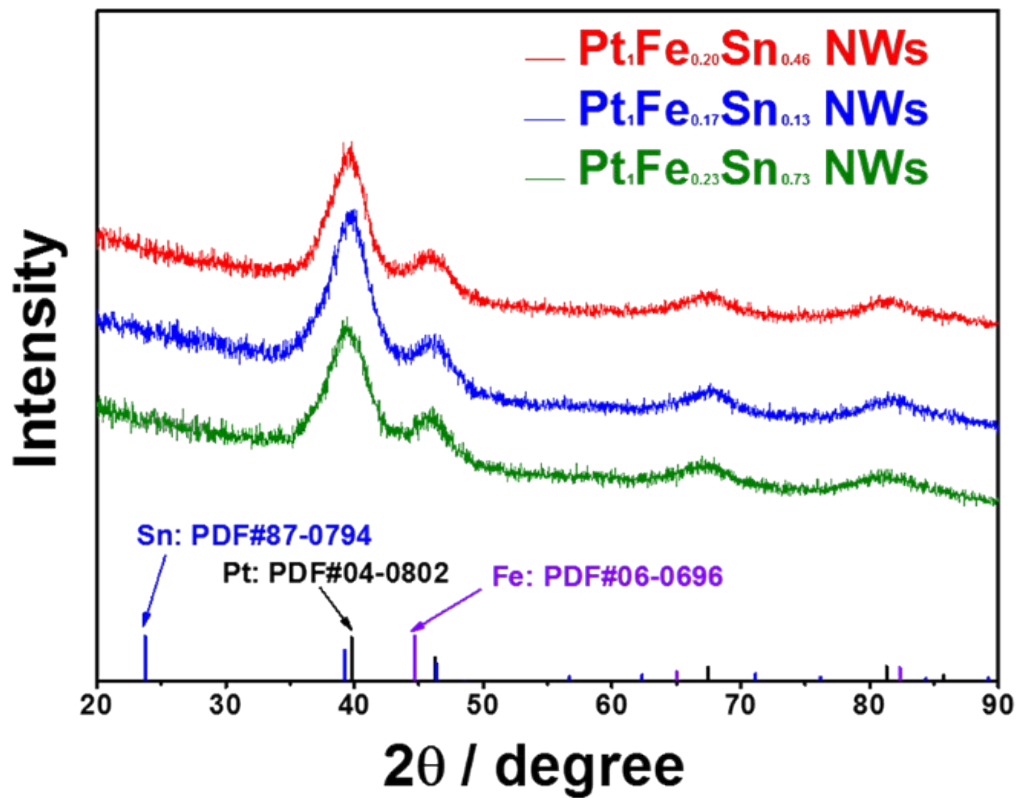

Fig. S4 XRD patterns of  $\text{Pt}_1\text{Fe}_{0.20}\text{Sn}_{0.46}$ ,  $\text{Pt}_1\text{Fe}_{0.17}\text{Sn}_{0.13}$  and  $\text{Pt}_1\text{Fe}_{0.23}\text{Sn}_{0.73}$  NWs.

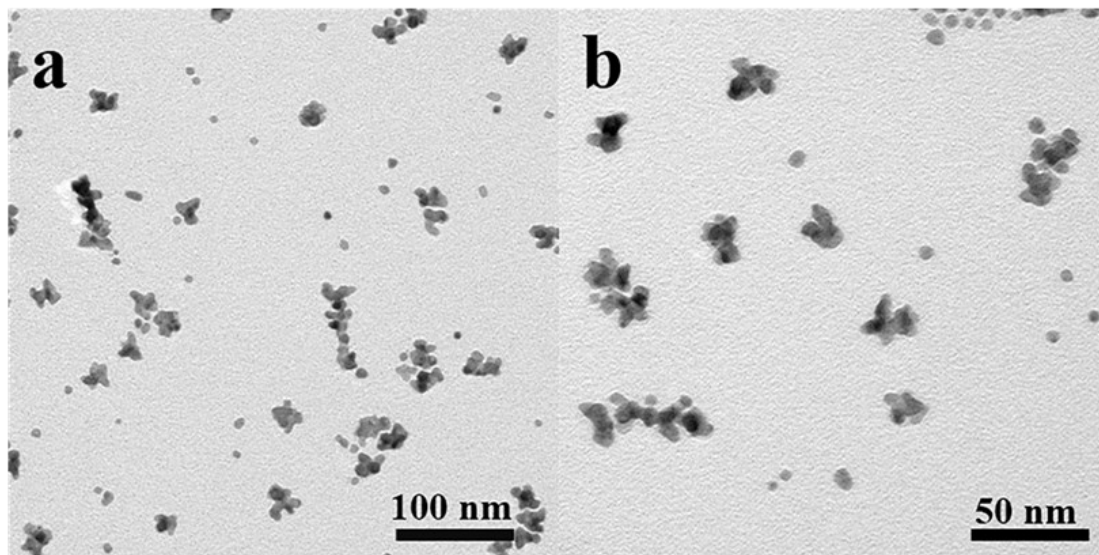

Fig. S5 (a, b) The TEM images of PtFeSn NPs.

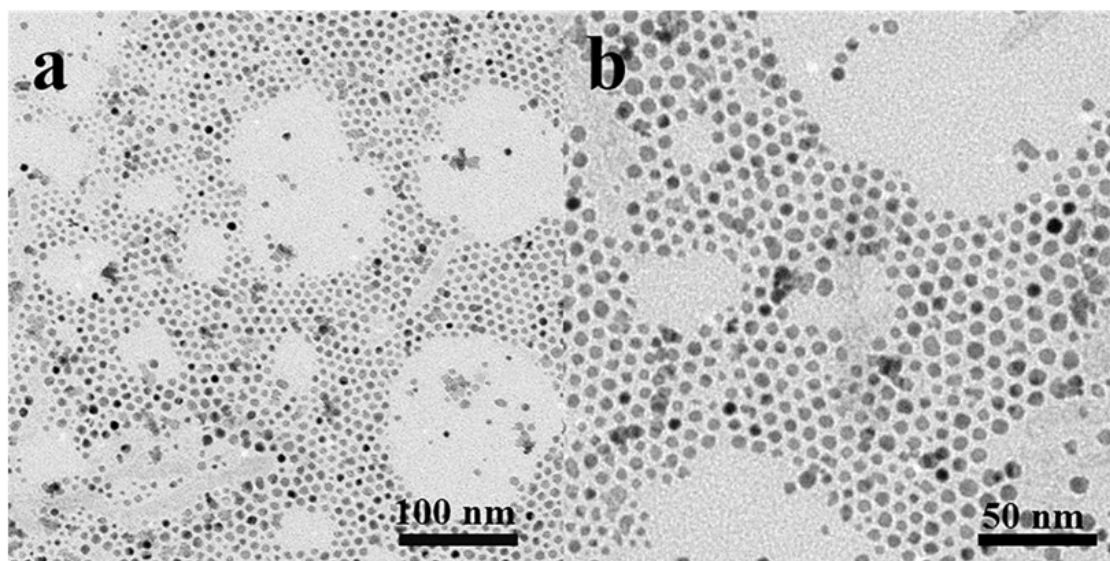

**Fig. S6** (a, b) The TEM images of PtSn NPs.

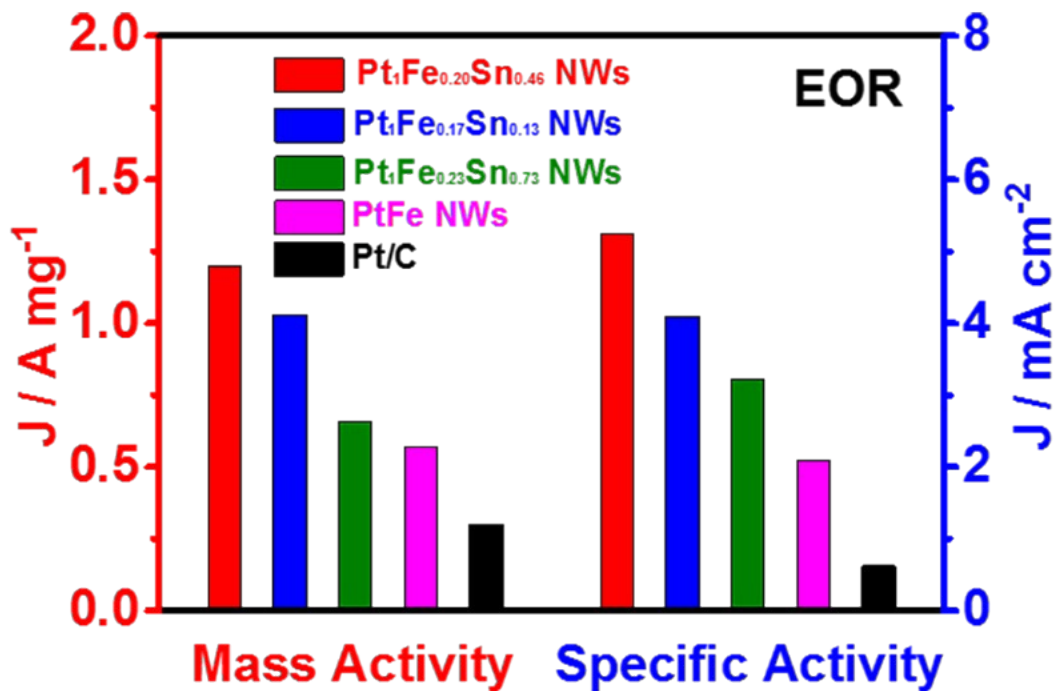

Fig. S7 The mass and specific activities of different catalysts operated in 0.1 M  $\text{HClO}_4$  + 0.5 M  $\text{C}_2\text{H}_5\text{OH}$  solution.

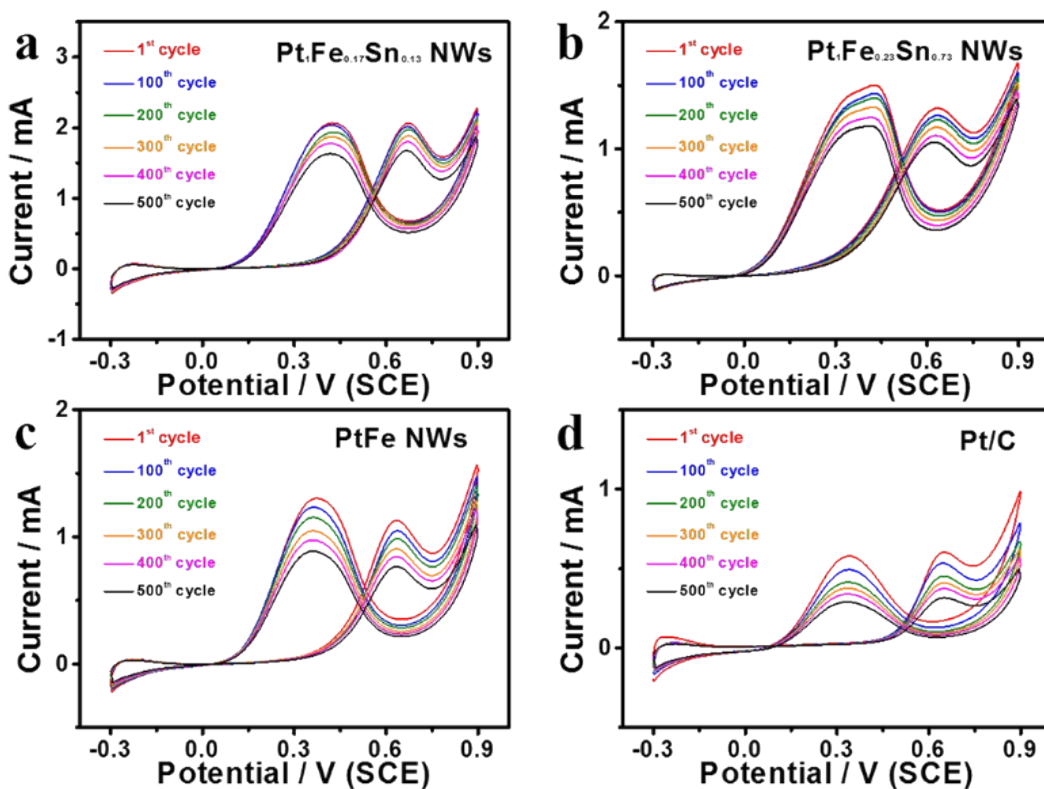

Fig. S8 CV curves of (a)  $\text{Pt}_1\text{Fe}_{0.17}\text{Sn}_{0.13}$  NWs, (b)  $\text{Pt}_1\text{Fe}_{0.23}\text{Sn}_{0.73}$  NWs, (c) PtFe NWs and (d) commercial Pt/C for the EOR over 500 cycles.

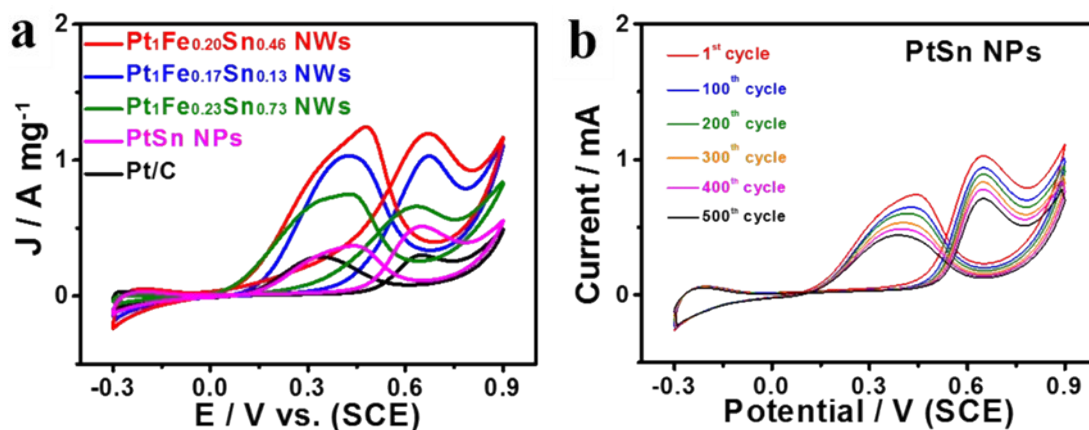

**Fig. S9** (a) CV curves of different catalysts operated in 0.1 M HClO<sub>4</sub> + 0.5 M C<sub>2</sub>H<sub>5</sub>OH solution. (b) CV curves of the PtSn NPs for the EOR over 500 cycles.

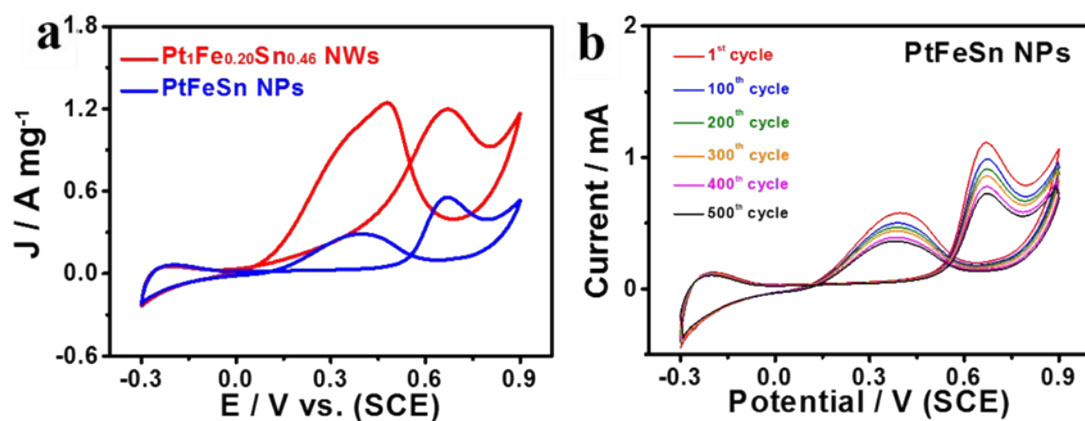

**Fig. S10** (a) CV curves of different catalysts operated in 0.1 M HClO<sub>4</sub> + 0.5 M C<sub>2</sub>H<sub>5</sub>OH solution. (b) CV curves of the PtFeSn NPs for the EOR over 500 cycles.

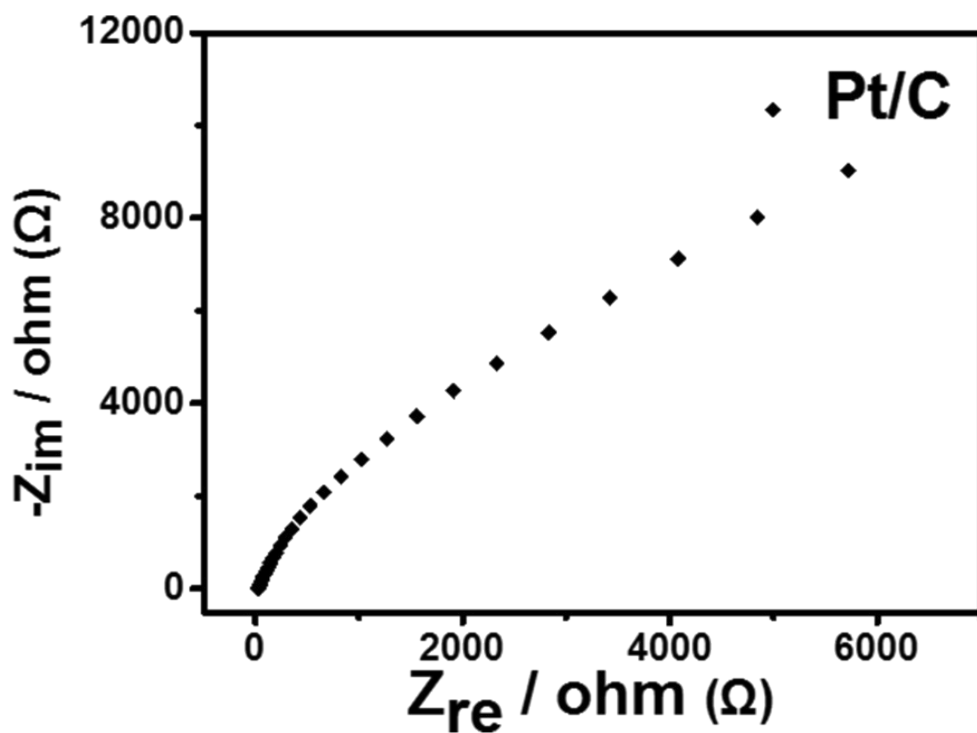

**Fig. S11** Nyquist plot of commercial Pt/C operated in the solution of 0.1 M HClO<sub>4</sub> + 0.5 M C<sub>2</sub>H<sub>5</sub>OH at the potential of 0.25 V.



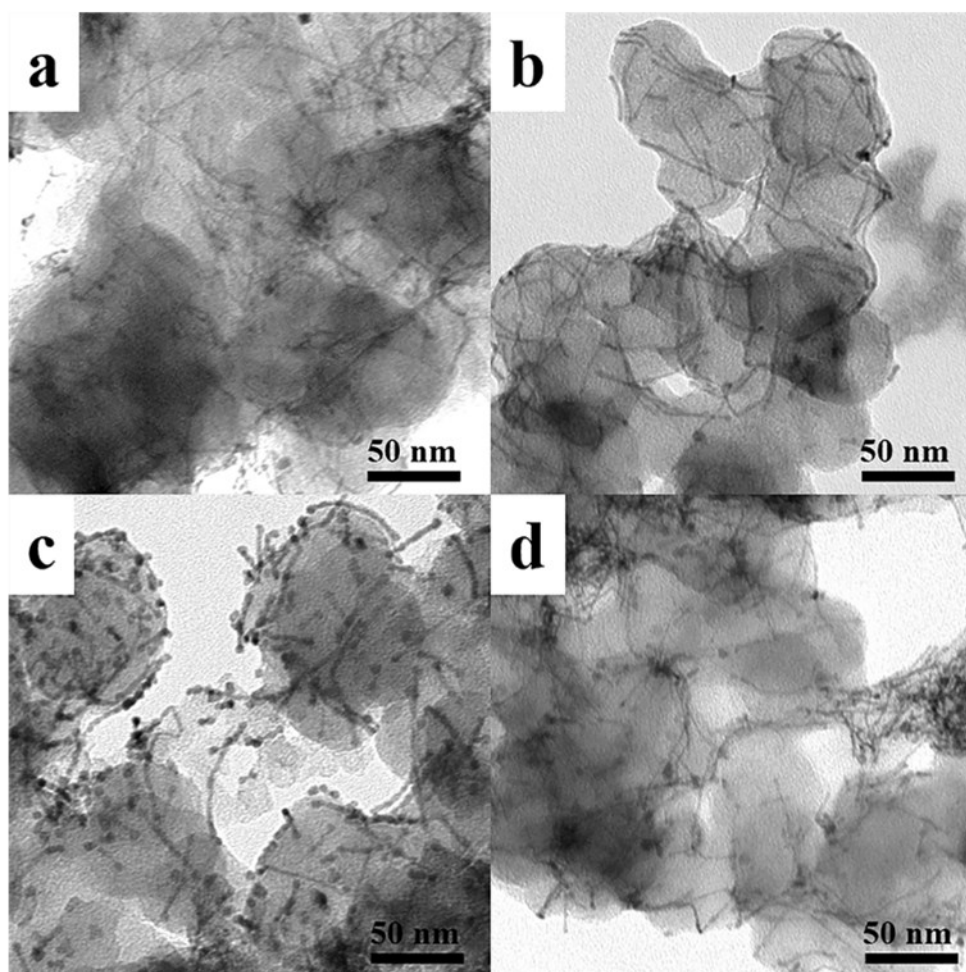

**Fig. S12** The TEM images of (a) Pt<sub>1</sub>Fe<sub>0.17</sub>Sn<sub>0.13</sub> NWs/C, (b) Pt<sub>1</sub>Fe<sub>0.20</sub>Sn<sub>0.46</sub> NWs/C, (c) Pt<sub>1</sub>Fe<sub>0.23</sub>Sn<sub>0.73</sub> NWs/C and (d) PtFe NWs/C before electrochemical durability test.

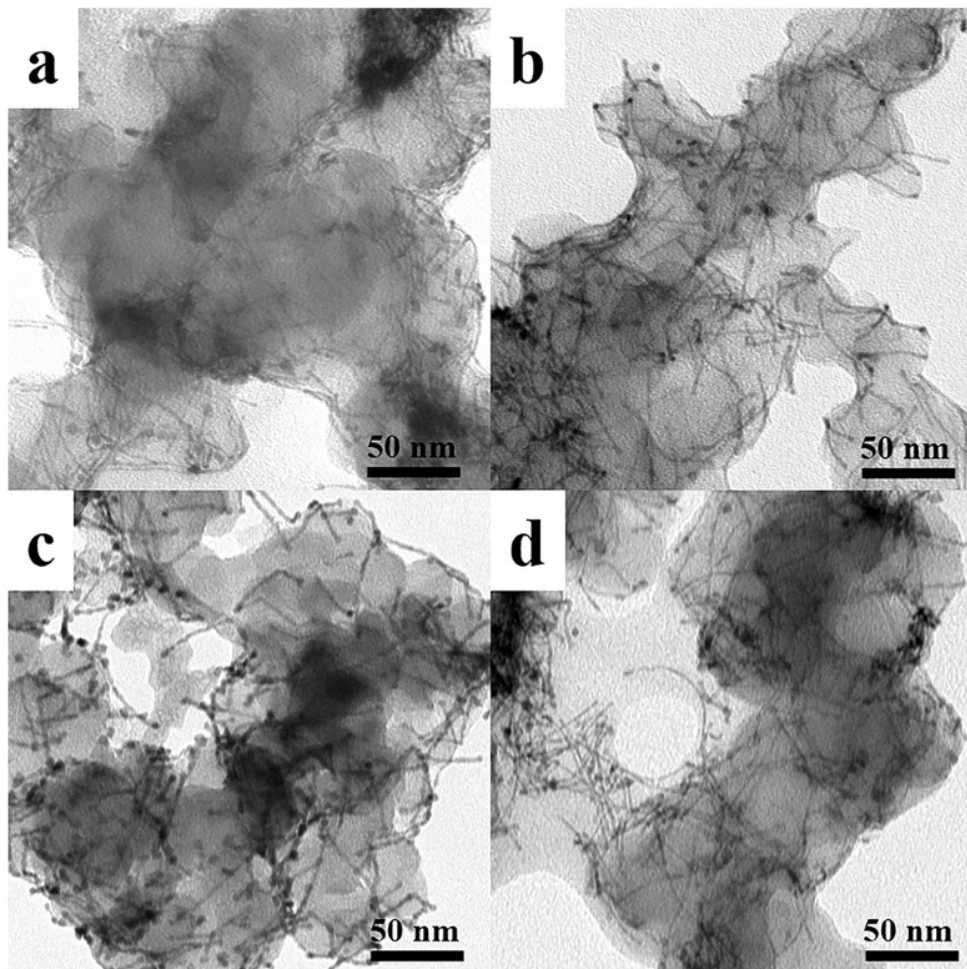

**Fig. S13** The TEM images of (a)  $\text{Pt}_1\text{Fe}_{0.17}\text{Sn}_{0.13}$  NWs/C, (b)  $\text{Pt}_1\text{Fe}_{0.20}\text{Sn}_{0.46}$  NWs/C, (c)  $\text{Pt}_1\text{Fe}_{0.23}\text{Sn}_{0.73}$  NWs/C and (d) PtFe NWs/C after 500 cycles in 0.1 M  $\text{HClO}_4$  + 0.5 M  $\text{C}_2\text{H}_5\text{OH}$  solution at  $50 \text{ mV s}^{-1}$ .

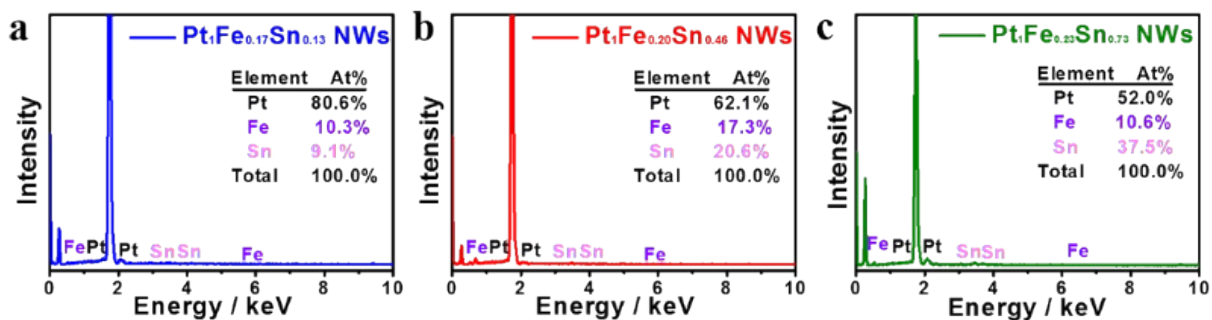

**Fig. S14** SEM-EDS of  $\text{Pt}_1\text{Fe}_{0.17}\text{Sn}_{0.13}$  NWs, (b)  $\text{Pt}_1\text{Fe}_{0.20}\text{Sn}_{0.46}$  NWs and (c)  $\text{Pt}_1\text{Fe}_{0.23}\text{Sn}_{0.73}$  NWs after 500 cycles in 0.1 M  $\text{HClO}_4$  and 0.5 M  $\text{C}_2\text{H}_5\text{OH}$  at  $50 \text{ mV s}^{-1}$ .

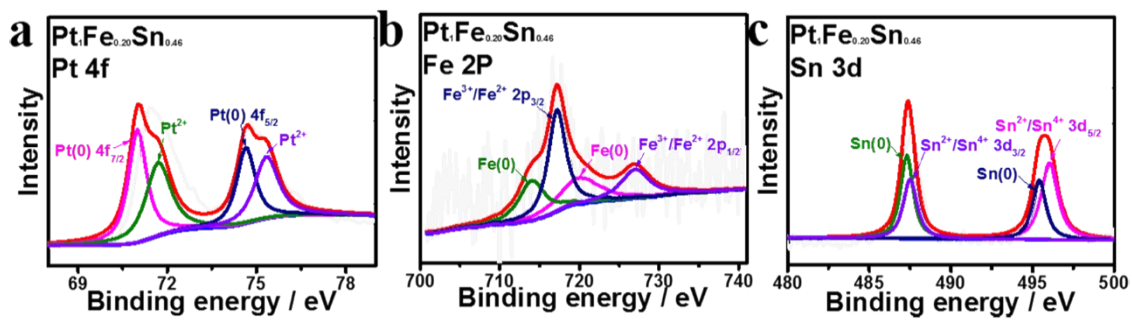

**Fig.S15** XPS patterns of Pt<sub>1</sub>Fe<sub>0.20</sub>Sn<sub>0.46</sub> NWs. (a) Pt 4f, (b) Fe 2p and (c) Sn 3d of PtFeSn NWs after 500 cycles in 0.1 M HClO<sub>4</sub> and 0.5 M C<sub>2</sub>H<sub>5</sub>OH at 50 mV s<sup>-1</sup>.

**Table S1.** Comparison of Pt<sub>1</sub>Fe<sub>0.20</sub>Sn<sub>0.46</sub> NWs with other Pt-based electrocatalysts for the EOR.

| Catalysts                                                 | Peaks currents from CV curves J <sub>m</sub> (A/mg) | Electrolyte                                                                   | References                                               |
|-----------------------------------------------------------|-----------------------------------------------------|-------------------------------------------------------------------------------|----------------------------------------------------------|
| Pt <sub>1</sub> Fe <sub>0.20</sub> Sn <sub>0.46</sub> NWs | 1.21                                                | 0.1 M HClO <sub>4</sub> + 0.5 M C <sub>2</sub> H <sub>5</sub> OH              | <b>This work</b>                                         |
| Pt–NiO/C2 NPs                                             | 0.64                                                | 0.5 M H <sub>2</sub> SO <sub>4</sub> + 1 M C <sub>2</sub> H <sub>5</sub> OH   | J. Power Sources <b>2015</b> , 278, 119-127.             |
| Au <sub>2</sub> Pt <sub>1</sub> NWNs                      | 0.57                                                | 0.5 M H <sub>2</sub> SO <sub>4</sub> + 0.5 M C <sub>2</sub> H <sub>5</sub> OH | Int. J. Hydrogen Energy <b>2016</b> , 41, 21, 8871-8880. |
| Pt/MV–RGO–CH                                              | 0.44                                                | 0.5 M H <sub>2</sub> SO <sub>4</sub> + 1.3 M C <sub>2</sub> H <sub>5</sub> OH | Electron. Mater. Lett <b>2018</b> , 14, 616-628.         |
| Pt <sub>94</sub> Zn <sub>6</sub> NWs                      | 0.40                                                | 0.1 M HClO <sub>4</sub> + 0.2 M C <sub>2</sub> H <sub>5</sub> OH              | Nano. Res <b>2019</b> , 12, 5, 1173-1179.                |
| Pt–Sn–Ce/C (50:20:30)                                     | 0.38                                                | 0.5 M H <sub>2</sub> SO <sub>4</sub> + 0.5 M C <sub>2</sub> H <sub>5</sub> OH | Appl. Catal. B-Environ <b>2015</b> , 165, 176-184.       |
| Pt/C–Cu <sub>3</sub> P 50%                                | 0.41                                                | 0.5 M H <sub>2</sub> SO <sub>4</sub> + 1 M C <sub>2</sub> H <sub>5</sub> OH   | Electrochim. Acta <b>2016</b> , 220, 193-204.            |
| networked Pt <sub>6</sub> Sn <sub>3</sub> NWs             | 1.08                                                | 0.1 M HClO <sub>4</sub> + 0.5 M C <sub>2</sub> H <sub>5</sub> OH              | J. Mater. Chem. A <b>2017</b> , 5, 24626–24630.          |

**Table S2.** Comparison of Pt<sub>1</sub>Fe<sub>0.20</sub>Sn<sub>0.46</sub> NWs with other Pt-based electrocatalysts for the MOR.

| Catalysts                                                  | Peaks currents from CV curves J <sub>m</sub> (A/mg) | Electrolyte                                                     | References                                                 |
|------------------------------------------------------------|-----------------------------------------------------|-----------------------------------------------------------------|------------------------------------------------------------|
| Pt <sub>1</sub> Fe <sub>0.20</sub> Sn <sub>0.46</sub> NWs  | 1.49                                                | 0.1 M HClO <sub>4</sub> + 0.5 M CH <sub>3</sub> OH              | <b>This work</b>                                           |
| Pt <sub>94</sub> Zn <sub>6</sub> NWs                       | 0.51                                                | 0.1 M HClO <sub>4</sub> + 0.2 M CH <sub>3</sub> OH              | Nano. Res <b>2019</b> , 12, 5, 1173-1179.                  |
| Pt/graphene-TiO <sub>2</sub> -40%                          | 0.42                                                | 0.5 M H <sub>2</sub> SO <sub>4</sub> + 0.5 M CH <sub>3</sub> OH | J. Power Sources <b>2015</b> , 279, 210-217.               |
| Pt/C/GA                                                    | 0.41                                                | 0.5 M H <sub>2</sub> SO <sub>4</sub> + 0.5 M CH <sub>3</sub> OH | Electrochim. Acta <b>2016</b> , 189, 175-183.              |
| Pt-MoO <sub>3</sub> -RGO HNRA <sub>s</sub>                 | 0.81                                                | 0.5 M H <sub>2</sub> SO <sub>4</sub> + 0.5 M CH <sub>3</sub> OH | J. Mater. Chem. A <b>2016</b> , 4, 1923-1930.              |
| Pt/Ti <sub>0.95</sub> Fe <sub>0.05</sub> N NT <sub>s</sub> | 0.72                                                | 0.5 M H <sub>2</sub> SO <sub>4</sub> + 1.0 M CH <sub>3</sub> OH | Int. J. Hydrogen Energy <b>2018</b> , 43, 20, 9777-9786.   |
| Pt/N-CNT <sub>s</sub> @TiNiN                               | 0.86                                                | 0.5 M H <sub>2</sub> SO <sub>4</sub> + 1.0 M CH <sub>3</sub> OH | Int. J. Hydrogen Energy <b>2018</b> , 43, 50, 22519-22528. |
| Pt/SPG                                                     | 1.13                                                | 0.5 M H <sub>2</sub> SO <sub>4</sub> + 0.5 M CH <sub>3</sub> OH | Electrochim. Acta <b>2018</b> , 285, 202-213.              |
